# Supplementary material
Source: Springer Nature journal article supplement (https://www.springermedizin.de/resource/supplementary/13075_2011_3461_MOESM3_ESM.pdf/9694570)

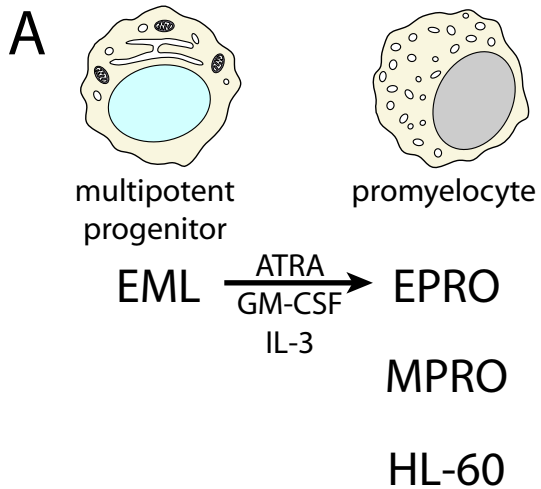

**B**

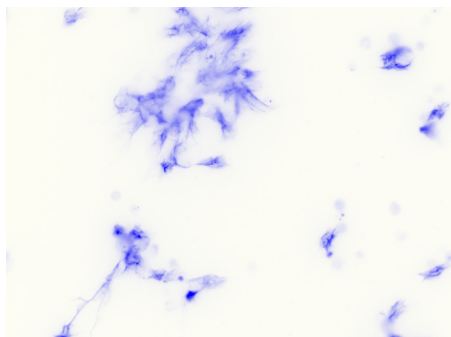

EPRO

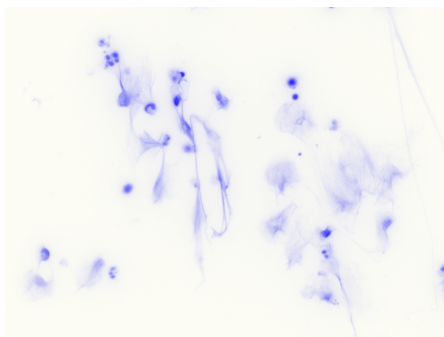

HL-60

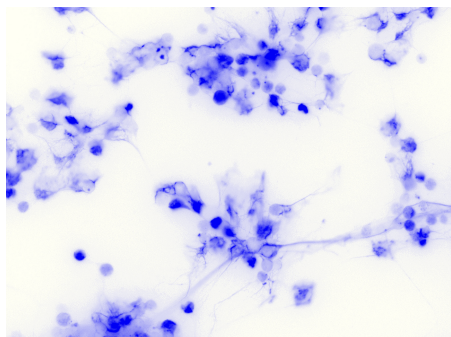

MPRO

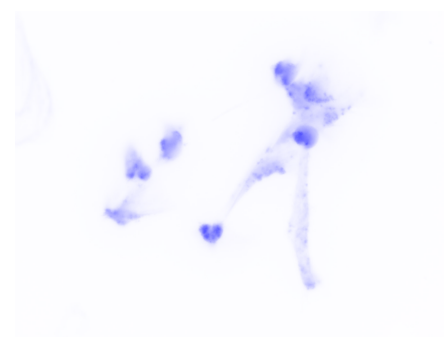

Human (primary)

Supplement: MOESM3 [file 9694570]
